# Supplementary material
Source: Springer Nature journal article supplement (https://www.springermedizin.de/resource/supplementary/12889_2005_395_MOESM3_ESM.pdf/9501532)

a-b

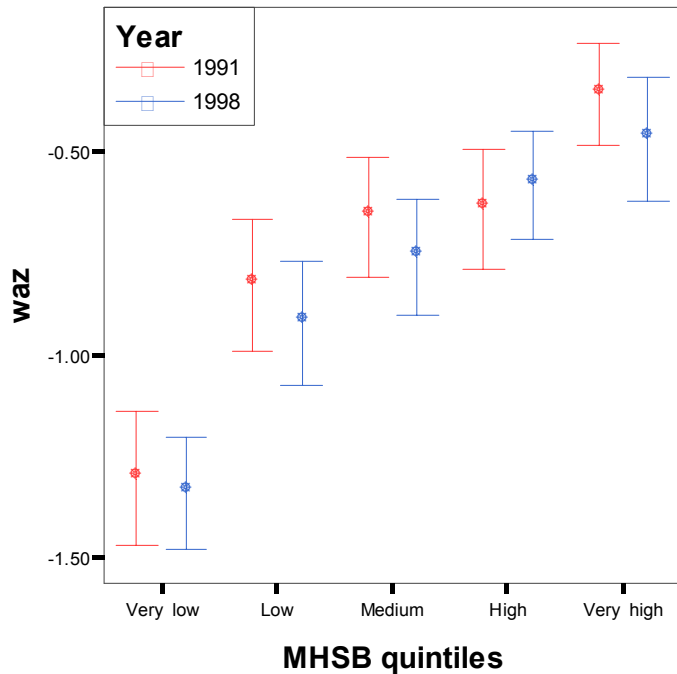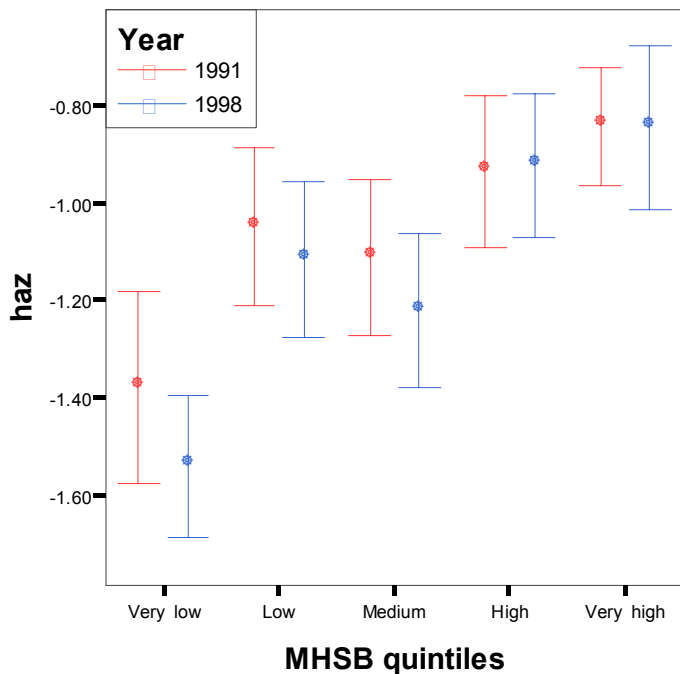

Supplement: MOESM3 [file 9501532]
